# Supplementary material for: A pilot study to understand feasibility and acceptability of stool and cord blood sample collection for a large-scale longitudinal birth cohort
Source: PubMed Central journal article supplement (PMC5745976; doi:10.1186/s12884-017-1627-7), 2017-12-28
Supplement: 12884_2017_1627_MOESM3_ESM.pdf [file 12884_2017_1627_MOESM3_ESM.pdf]

Do you have any other comments or suggestions about the study?

---

---

---

---

---

---

---

---

Would you be willing to let us contact you again in the future?  
We would like to interview a small number of women who have provided samples so that we can share your experiences with other women taking part in the study. With your further permission at the time, this might involve a recorded or filmed interview. You can still decide to refuse if you change your mind when we contact you.

Yes  No

If yes, please provide your contact details:

Name

Phone

Email

Signature

**Thank you for completing the questionnaire.  
We are extremely grateful for your time and help.**

Participant Identification (ID) Number:

University College   
London Hospitals  
NHS Foundation Trust

---

## Post-birth questionnaire

### Infection and immunity pilot study

We would like you to answer some questions for us about the study materials and your experience of being involved in the study. All your answers will be kept confidential and will **not** affect your treatment or your baby's treatment in any way.

You may find that you have answered some questions like this before but we are also interested in finding out if your opinions and feelings have changed from last time you gave us this feedback.

#### A Study information

How satisfied are you with the information you received about the following:

Why we want to do research into microbes (bugs, like bacteria and viruses) and the immune system?

Very satisfied  Satisfied  Neither  Unsatisfied  Very unsatisfied

Why we need to take samples from mothers and their babies?

Very satisfied  Satisfied  Neither  Unsatisfied  Very unsatisfied

What taking part in the pilot study would involve?

Very satisfied  Satisfied  Neither  Unsatisfied  Very unsatisfied
