# Supplementary material for: A pilot study to understand feasibility and acceptability of stool and cord blood sample collection for a large-scale longitudinal birth cohort
Source: BMC Pregnancy Childbirth. 2017 Dec 28;17:439. doi: 10.1186/s12884-017-1627-7 (PMC5745976; doi:10.1186/s12884-017-1627-7)
Supplement: Supplementary file 2 — Pre-birth questionnaire, pilot study questionnaire given to all women who consented to participate prior to sample collection. (PDF 368 kb) [file 12884_2017_1627_MOESM2_ESM.pdf]

This image shows a single sheet of white paper with horizontal ruling lines. The lines are evenly spaced and run across the width of the page. There are no margins, text, or other markings on the paper.

Mr Pat O'Brien, UCLH NHS Foundation Trust, 2nd Floor North, 250 Euston Road NW1 2PG  
Professor Peter Brocklehurst, Institute for Women's Health, University College London, Medical School Building, 74 Huntley Street WC1E 6AU

\_\_\_\_\_

## Pre-birth questionnaire

### Infection and immunity pilot study

Please tick the box that best represents your views.

How satisfied are you with the information you received about the following:

Very Satisfied ☐ Satisfied ☐ Neither ☐ Unsatisfied ☐ Very Unsatisfied ☐

Very Satisfied ☐ Satisfied ☐ Neither ☐ Unsatisfied ☐ Very Unsatisfied ☐

Very Satisfied ☐ Satisfied ☐ Neither ☐ Unsatisfied ☐ Very Unsatisfied ☐

**B Biological samples** (please answer these questions even if you do **not** plan to take part in the pilot study)

Overall, how comfortable do you feel with the idea of providing the following samples? (Note that only the samples with a star (\*) next to them are being collected in this pilot study.)

| Sample                 | Very comfortable         | Comfortable              | Neither                  | Uncomfortable            | Very uncomfortable       |
|------------------------|--------------------------|--------------------------|--------------------------|--------------------------|--------------------------|
| Urine                  | <input type="checkbox"/> |
| Stool (poo)*           | <input type="checkbox"/> |
| Vaginal swab           | <input type="checkbox"/> |
| Placenta (afterbirth)* | <input type="checkbox"/> |
| Umbilical cord*        | <input type="checkbox"/> |
| Umbilical cord blood*  | <input type="checkbox"/> |

How comfortable do you feel with the idea of the following samples being collected from your baby? (Again, only samples with a star (\*) next to them are being collected in this pilot study.)

| Sample                        | Very comfortable         | Comfortable              | Neither                  | Uncomfortable            | Very uncomfortable       |
|-------------------------------|--------------------------|--------------------------|--------------------------|--------------------------|--------------------------|
| Saliva swab from your baby    | <input type="checkbox"/> |
| Urine from your baby's nappy  | <input type="checkbox"/> |
| Stool from your baby's nappy* | <input type="checkbox"/> |

How comfortable do you feel with the idea of posting a stool sample taken after birth from your baby's nappy, if we gave you a special pot and packaging, and explained carefully how to do this?

Very comfortable    Comfortable    Neither    Uncomfortable    Very uncomfortable

☐    ☐    ☐    ☐    ☐

If you feel uncomfortable or very uncomfortable about any of the above samples, please tell us why.

This image shows a blank sheet of white paper with horizontal ruling lines. The lines are evenly spaced and run across the width of the page. There are no margins, text, or other markings on the paper.

Are you planning to take part in the pilot study?

☐ Yes

☐ No

☐ Not sure
